# Supplementary material for: Describing the dynamic translational science landscape through Core Voucher utilization
Source: PubMed Central journal article supplement (PMC6802412; doi:10.1017/cts.2019.4), 2019-06-14
Supplement: S2059866119000049sup001.pdf [file S2059866119000049sup001.pdf]

**Supplementary Table 1:** List of cores added to, or retired from, UCLA CTSI website. Since 2012, nineteen cores have been added to the UCLA CTSI website, while 15 have been retired or consolidated with pre-existing cores

| <b>Core Status</b> | <b>Core Name</b>                                                 | <b>Core Category</b> |
|--------------------|------------------------------------------------------------------|----------------------|
| New                | Biobehavioral Research Core                                      | Animals              |
| New                | Large Animal Core                                                | Animals              |
| New                | Biobank & Translational Research Core                            | Cells                |
| New                | High-Resolution Tissue Respirometry Core                         | Cells                |
| New                | Immuno/BioSpot Core                                              | Cells                |
| New                | Metabolism and Mitochondrial Research Core                       | Cells                |
| New                | Biostatistics & Bioinformatics Core                              | Computations         |
| New                | Department of Medicine Statistics Core                           | Computations         |
| New                | Semel Institute Biostatistics Core                               | Computations         |
| New                | Center for Computer Vision and Imaging Biomarkers Laboratory     | Humans               |
| New                | Center for Human Nutrition                                       | Humans               |
| New                | Exercise Physiology Research Laboratory                          | Humans               |
| New                | Pathology Research Portal                                        | Humans               |
| New                | Pulmonary Function and Cardiopulmonary Exercise Testing Core Lab | Humans               |
| New                | Mass Spectrometry and Biomarker Discovery Core                   | Images               |
| New                | Translational Research Imaging Center                            | Images               |
| New                | Biomedical Mass Spectroscopy Facility                            | Molecules            |
| New                | Metabolomics and Proteomics Center                               | Molecules            |
| New                | Proteome Research Center                                         | Molecules            |
| Retired            | Mouse Pathology Core                                             | Animals              |
| Retired            | Preclinical Biobehavioral Core                                   | Animals              |
| Retired            | Embryonic Stem Cell / Transgenic Mice Shared Resource            | Cells                |
| Retired            | Immunotherapeutics Research Core                                 | Cells                |
| Retired            | Viral Vector Core                                                | Cells                |
| Retired            | Genotyping and Sequencing Core                                   | Genetics             |
| Retired            | High-throughput Genotyping Laboratory                            | Genetics             |
| Retired            | Carol Moss Spivak Advanced Light Microscopy Core                 | Images               |
| Retired            | Macro-Scale Imaging Lab                                          | Images               |
| Retired            | Two Photon Imaging Core                                          | Images               |
| Retired            | Functional Proteomics Laboratory                                 | Molecules            |
| Retired            | High-Throughput Clinical Proteomics Core                         | Molecules            |
| Retired            | Medical Mass Spectroscopy Facility                               | Molecules            |
| Retired            | W. M. Keck Proteomics Center                                     | Molecules            |
| Retired            | Glass Shop                                                       | Shops                |
| Retired            | Research Equipment and Chemical Store                            | Shops                |
